# Supplementary material for: Rapid Phenotypic Antibiotic Susceptibility Profiling of Clinical Escherichia coli and Klebsiella pneumoniae Blood Cultures
Source: MDPI journal article supplement (doi:10.3390/antibiotics13030231), 2024-02-29
Supplement: s1 [file s1]

Supplementary 4:

Samples 1-17:

Column A: The well position in the PCR.

Column B: Antibiotic treatment

Column C: Antibiotic concentrations.

Column D: Raw Ct value.

Column E:  $\Delta$ CT between a treated sample and the first growth control (GC).

Column F:  $\Delta$ CT between a treated sample and the second growth control (GC).

Column G: The average between column E and F.

Samples 18-63:

Column A: The well position in the PCR.

Column B: Raw Ct value.

Row named Ct: The raw Ct from column B according to their antibiotic name and concentration.

Row named Ct-average G.C.: The  $\Delta$ CT between a treated sample and the growth controls average (GC).
