# Supplementary material for: Rapid Phenotypic Antibiotic Susceptibility Profiling of Clinical Escherichia coli and Klebsiella pneumoniae Blood Cultures
Source: MDPI journal article supplement (doi:10.3390/antibiotics13030231), 2024-02-29
Supplement: s1 [file s1]

Supplementary Table S3:

For figure 1(A-B), genes that appear in all samples are not shown. The list of those resistance genes is provided here (names as they appear in the CARD database):

|                                                                                                                                                                                                                                                                                                                                                                                                                                                                                                                                                                                                                |
|----------------------------------------------------------------------------------------------------------------------------------------------------------------------------------------------------------------------------------------------------------------------------------------------------------------------------------------------------------------------------------------------------------------------------------------------------------------------------------------------------------------------------------------------------------------------------------------------------------------|
| <i>Escherichia coli</i> , Cephalosporin                                                                                                                                                                                                                                                                                                                                                                                                                                                                                                                                                                        |
| 'Escherichia coli soxR with mutation conferring antibiotic resistance', 'Escherichia coli AcrAB-TolC with AcrR mutation conferring resistance to ciprofloxacin, tetracycline, and ceftazidime', 'Escherichia coli acrA', 'marA', 'Escherichia coli soxS with mutation conferring antibiotic resistance', 'Klebsiella pneumoniae KpnF', 'acrB', 'Klebsiella pneumoniae KpnE', 'H-NS', 'Haemophilus influenzae PBP3 conferring resistance to beta-lactam antibiotics', 'TolC', 'AcrF', 'AcrS', 'AcrE', 'Escherichia coli AcrAB-TolC with MarR mutations conferring resistance to ciprofloxacin and tetracycline' |

  

|                                                                                                    |
|----------------------------------------------------------------------------------------------------|
| <i>Escherichia coli</i> , Aminoglycosides                                                          |
| 'acrD', 'baeS', 'baeR', 'kdpE', 'Klebsiella pneumoniae KpnF', 'TolC', 'Klebsiella pneumoniae KpnE' |
